# Supplementary material for: Optical nanogap antennas as plasmonic biosensors for the detection of miRNA biomarkers
Source: Royal Society of Chemistry journal article supplement (doi:10.1039/d0tb00307g), 2020-01-01
Supplement: d0tb00307g1.pdf [file d0tb00307g1.pdf]

## Supporting Information

### **Optical nanogap antennas as plasmonic biosensors for the detection of miRNA biomarkers**

Alejandro Portela<sup>a</sup>, Olalla Calvo-Lozano<sup>a</sup>, Alfonso Medina Escuela<sup>b</sup>, M.-Carmen Estevez<sup>a\*</sup>, Laura M. Lechuga<sup>a</sup>

<sup>a</sup>Nanobiosensors and Bioanalytical Applications Group (NanoB2A), Catalan Institute of Nanoscience and Nanotechnology (ICN2), CSIC, CIBER-BBN and BIST, Campus UAB Bellaterra, 08193 Barcelona, Spain.

<sup>b</sup>Institute for Applied Microelectronics (IUMA) University of Las Palmas de Gran Canaria, Las Palmas, 35017, Spain

\*Corresponding author: M.-Carmen Estevez: [mcarmen.estevez@icn2.cat](mailto:mcarmen.estevez@icn2.cat)

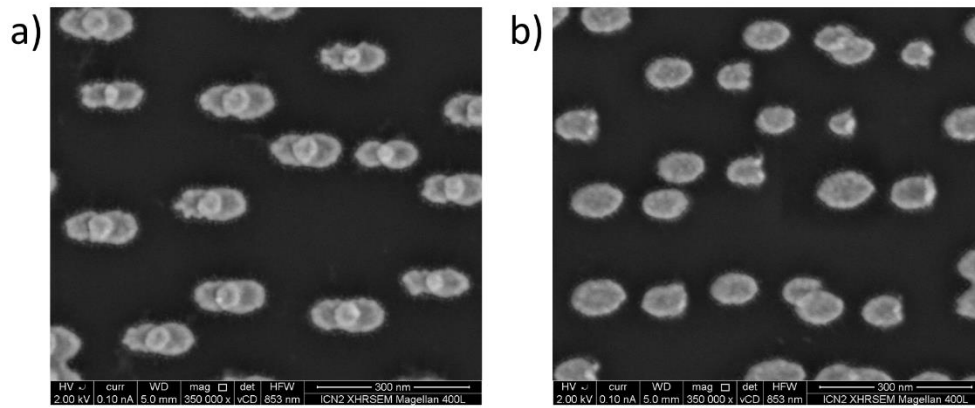

FigureS1. SEM image of Au nanogap antennas over a glass substrate. Au evaporation angle of a)  $\pm 7.5^\circ$ , where no gaps ( $< 0$  nm) are observed and the nanostructures appear overlapped; b)  $\pm 20^\circ$  resulting in nanoantennas with average gaps size of  $41.3 \pm 8.19$  nm.
